# Supplementary material
Source: PubMed Central journal article supplement (PMC7116388)

1b

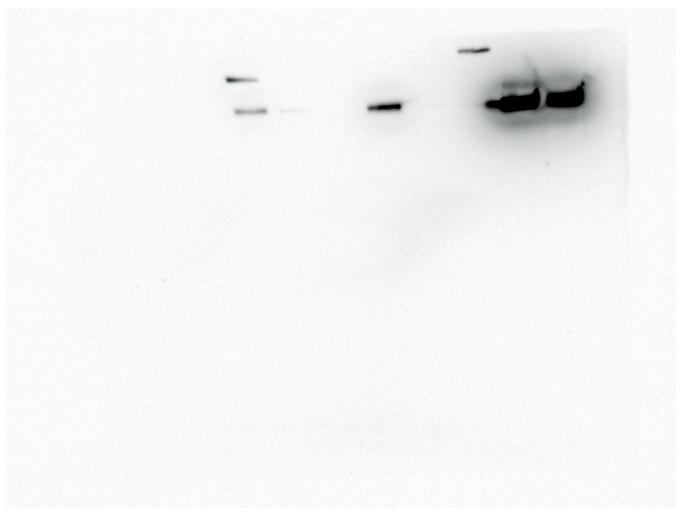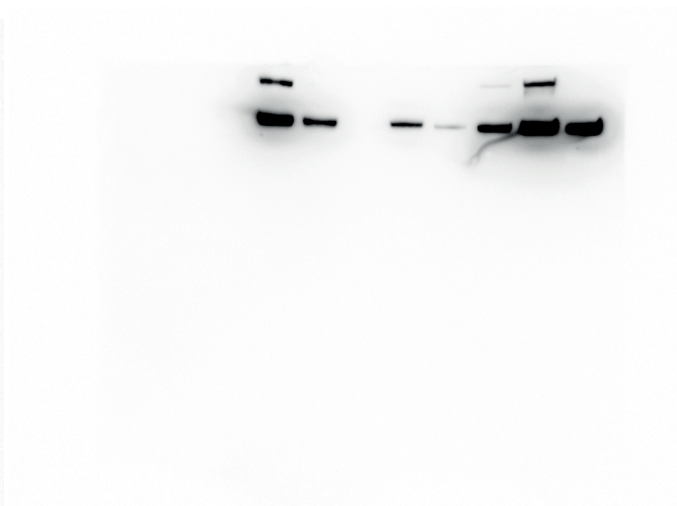

1c

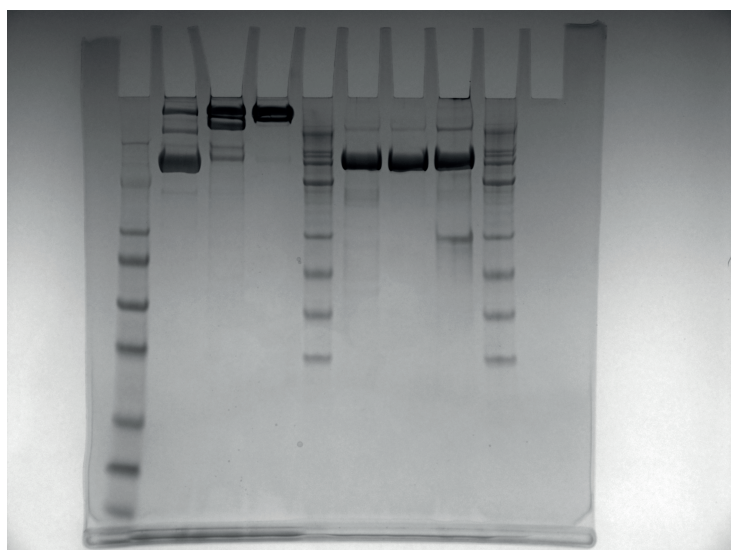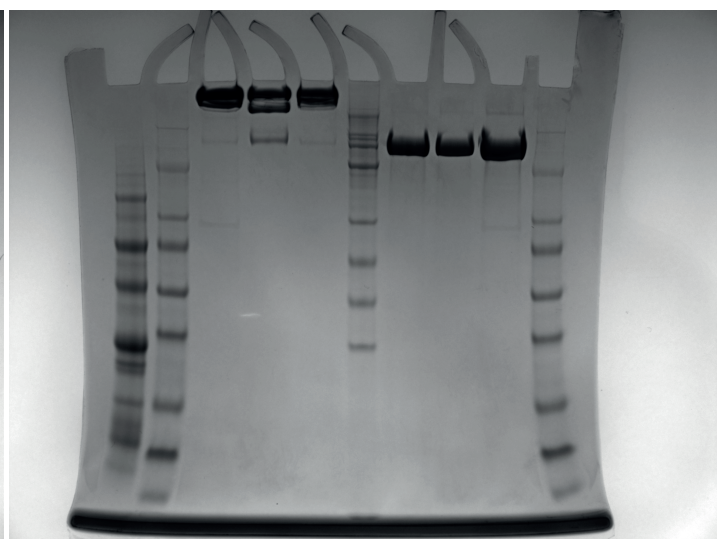

Supplement: EMS103707-supplement-Source_data_Fig1.pdf [file EMS103707-supplement-Source_data_Fig1.pdf]
